# Supplementary material for: Many-molecule encapsulation by an icosahedral shell
Source: eLife journal article supplement (doi:10.7554/elife.14078), 2016-05-11
Supplement: fig3-data2 [file elife-14078-fig3-data2-v3-download.zip]

| Symbol | Name                     | Description                                                                                                                                                                                                                                         |
|--------|--------------------------|-----------------------------------------------------------------------------------------------------------------------------------------------------------------------------------------------------------------------------------------------------|
| ■      | Complete capsid (full)   | Shell comprises 12 pentamers and 20 hexamers, with more than 50 cargo molecules inside                                                                                                                                                              |
| ◆      | Complete capsid (empty)  | Shell comprises 12 pentamers and 20 hexamers, with fewer than 50 cargo molecules inside                                                                                                                                                             |
| ●      | Attached                 | Number of cargo molecules in the globule>150, 4 or fewer shells attached to the globule, each with 10 to 31 subunits                                                                                                                                |
| ✱      | Over-nucleated/Malformed | Number of cargo molecules in largest globule<150, number of subunits in one or more shells >32 or more than 12 pentamers in a shell, or more than 20 hexamers in a shell, or more than 4 shells with fewer than 10 subunits attached to the globule |
| ×      | Stalled                  | Same as Over-nucleated, except with more than 150 cargo molecules in the globule                                                                                                                                                                    |
| □      | Globule                  | Number of cargo molecules in the globule <50, number of subunits in the largest shell<10                                                                                                                                                            |
| ⊙      | Unnucleated              | Number of cargo molecules in the globule <50, number of subunits in the largest shell<10                                                                                                                                                            |
